# Supplementary material for: Pharmacokinetic-pharmacodynamic correlations in the development of ginger extract as an anticancer agent
Source: PubMed Central journal article supplement (PMC5813242; doi:10.1038/s41598-018-21125-2), 2018-02-14

*Supplementary information for*

**Pharmacokinetic-pharmacodynamic correlations in the development of ginger extract as an anticancer agent**

Rao Mukkavilli<sup>1</sup>, Chunhua Yang<sup>1</sup>, Reenu Singh Tanwar<sup>1</sup>, Roopali Saxena<sup>1</sup>, Sushma R. Gundala<sup>1</sup>, Yingyi Zhang<sup>1</sup>, Ahmed Ghareeb<sup>1</sup>, Stephan D Floyd<sup>1</sup>, Subrahmanyam Vangala<sup>2</sup>, Wei-Wen Kuo<sup>3</sup>, Padmashree CG Rida<sup>1</sup>, Ritu Aneja<sup>1</sup>

<sup>1</sup>Department of Biology, Georgia State University, Atlanta, GA-30303

<sup>2</sup>ReaGene Biosciences Private Limited, Bengaluru, India

<sup>3</sup>Department of Biological Science and Technology, College of Biopharmaceutical and Food Sciences, China Medical University, Taichung, Taiwan, ROC

\*Correspondence Author:

Ritu Aneja, PhD

Department of Biology, Georgia State University, Atlanta, GA 30303

Email : [raneja@gsu.edu](mailto:raneja@gsu.edu); Phone : 404-413-5417; Fax: 404-413-5301

This supplementary information includes Supplementary Tables 1 to 13 and Supplementary Figures 1 to 2.

**Supplementary Table 1**

**Concentrations of conjugated (c) and free (f) forms of GE phenolics in stomach following daily dose administration of GE (n=3 per time point, mean ± SD)**

| Time (h)  | Concentration (mean ± SD, ng/mL) |           |          |          |          |           |          |           |
|-----------|----------------------------------|-----------|----------|----------|----------|-----------|----------|-----------|
|           | 6G                               |           | 8G       |          | 10G      |           | 6S       |           |
|           | c                                | f         | C        | F        | C        | f         | C        | f         |
| Pre-dose* | 2.05 ±                           | 5.02 ±    | 0.10 ±   | 0.10 ±   | 0.12 ±   | 1.15 ±    | 0.61 ±   | 1.73 ±    |
|           | 1.58                             | 1.76      | 0.01     | 0.01     | 0.10     | 0.26      | 0.65     | 0.28      |
| 0.16      | 6956.64 ±                        | 17077.16  | 632.29 ± | 2349.25  | 310.12 ± | 1537.09 ± | 102.48 ± | 804.68    |
|           | 1217.51                          | ± 482.27  | 474.35   | ± 101.98 | 175.98   | 43.69     | 115.63   | ±70.45    |
| 0.25      | 6674.72 ±                        | 12701.44  | 955.33 ± | 2055.37  | 749.61 ± | 1538.63 ± | 325.66 ± | 1584.02 ± |
|           | 1898.18                          | ± 2961.32 | 705.80   | ± 640.28 | 516.87   | 532.30    | 184.48   | 402.94    |
| 0.5       | 3842.96 ±                        | 7632.29 ± | 585.43 ± | 1614.75  | 448.69 ± | 1190.64 ± | 68.69 ±  | 763.68 ±  |
|           | 1231.79                          | 368.48    | 351.22   | ± 185.02 | 299.93   | 137.61    | 28.18    | 60.66     |
| 1         | 3307.34 ±                        | 6155.38 ± | 850.74 ± | 1897.19  | 589.80 ± | 1661.25 ± | 258.17 ± | 1127.20 ± |
|           | 1076.82                          | 928.22    | 651.20   | ± 497.96 | 383.76   | 420.19    | 176.65   | 191.35    |
| 2         | 1976.02 ±                        | 3677.81 ± | 448.42 ± | 906.03 ± | 410.59 ± | 734.32 ±  | 43.70 ±  | 251.69 ±  |
|           | 505.05                           | 403.48    | 347.11   | 185.47   | 286.52   | 138.30    | 49.25    | 38.82     |
| 4         | 172.36 ±                         | 389.25 ±  | 71.09 ±  | 239.25 ± | 94.18 ±  | 394.26 ±  | 5.50 ±   | 96.00 ±   |
|           | 21.50                            | 48.80     | 29.79    | 67.22    | 52.53    | 107.11    | 0.51     | 23.62     |
| 6         | 577.59 ±                         | 585.49 ±  | 402.63 ± | 304.68 ± | 693.61 ± | 478.68    | 97.54 ±  | 88.52 ±   |
|           | 169.62                           | 32.89     | 144.65   | 34.41    | 195.00   | 44.00     | 32.57    | 9.53      |
| 8         | 58.93 ±                          | 181.23 ±  | 42.65 ±  | 126.79 ± | 89.86 ±  | 216.35 ±  | 28.07 ±  | 32.71 ±   |
|           | 27.74                            | 27.02     | 42.88    | 48.54    | 95.13    | 88.87     | 5.50     | 7.04      |

SD: Standard deviation; LLOQ: 0.1 ng/mL; \*trough levels on day 7 after 6 days GE dosing

**Supplementary Table 2**  
**Concentrations of conjugated (c) and free (f) forms of GE phenolics in intestine**  
**following daily dose administration of GE (n=3 per time point, mean ± SD)**

| Time (h)  | Concentration (mean ± SD, ng/mL) |          |         |         |         |          |        |         |
|-----------|----------------------------------|----------|---------|---------|---------|----------|--------|---------|
|           | 6G                               |          | 8G      |         | 10G     |          | 6S     |         |
|           | c                                | f        | C       | F       | C       | f        | C      | f       |
| Pre-dose* | 2.54 ±                           | 4.43 ±   | 0.4 ±   | 1.46 ±  | 0.26 ±  | 1.66 ±   | 1.91 ± | 0.40 ±  |
|           | 0.53                             | 1.14     | 0.35    | 0.36    | 0.15    | 0.16     | 0.54   | 0.52    |
| 0.16      | 89.59 ±                          | 156.77 ± | 16.37 ± | 26.41 ± | 16.00 ± | 24.77 ±  | 1.02 ± | 13.74 ± |
|           | 19.44                            | 10.66    | 1.41    | 1.37    | 0.99    | 0.88     | 0.28   | 1.01    |
| 0.25      | 164.79 ±                         | 362.29 ± | 18.42 ± | 37.30 ± | 29.63 ± | 45.10 ±  | 0.59 ± | 16.28 ± |
|           | 9.74                             | 17.91    | 1.04    | 1.11    | 0.39    | 1.69     | 0.50   | 0.30    |
| 0.5       | 33.58 ±                          | 220.90 ± | 2.59 ±  | 28.00 ± | 3.63 ±  | 38.72 ±  | 6.03 ± | 4.96 ±  |
|           | 19.48                            | 19.10    | 1.61    | 0.62    | 1.64    | 1.39     | 1.92   | 0.22    |
| 1         | 32.09 ±                          | 315.94 ± | 20.40 ± | 85.09 ± | 23.96 ± | 126.66 ± | 0.72 ± | 26.90 ± |
|           | 6.01                             | 13.16    | 5.67    | 1.99    | 5.38    | 2.18     | 0.53   | 2.11    |
| 2         | 41.28 ±                          | 180.42 ± | 14.72 ± | 48.33 ± | 13.88 ± | 54.20 ±  | 1.03 ± | 10.47 ± |
|           | 7.13                             | 15.37    | 5.24    | 3.29    | 6.08    | 4.36     | 0.53   | 0.61    |
| 4         | 28.12 ±                          | 61.24 ±  | 3.40 ±  | 26.99 ± | 11.91 ± | 45.72 ±  | 3.74 ± | 5.10 ±  |
|           | 2.39                             | 2.51     | 1.70    | 1.38    | 2.45    | 2.88     | 0.23   | 0.26    |
| 6         | 12.48 ±                          | 51.65 ±  | 0.70 ±  | 24.58 ± | 4.60 ±  | 38.66 ±  | 2.80 ± | 4.22 ±  |
|           | 2.39                             | 2.01     | 0.43    | 0.09    | 2.13    | 1.65     | 1.38   | 0.14    |
| 8         | 5.75 ±                           | 27.19 ±  | 1.48 ±  | 11.05 ± | 3.57 ±  | 14.63 ±  | 0.75 ± | 2.07 ±  |
|           | 1.87                             | 1.19     | 0.52    | 0.74    | 1.33    | 0.47     | 0.26   | 0.42    |

SD: Standard deviation; LLOQ: 0.1 ng/mL; \*trough levels on day 7 after 6 days GE dosing

**Supplementary Table 3**  
**Concentrations of conjugated (c) and free (f) forms of GE phenolics in liver**  
**following daily dose administration of GE (n=3 per time point, mean ± SD)**

| Time (h)  | Concentration (mean ± SD, ng/mL) |                   |                |                 |                 |                 |                |                 |
|-----------|----------------------------------|-------------------|----------------|-----------------|-----------------|-----------------|----------------|-----------------|
|           | 6G                               |                   | 8G             |                 | 10G             |                 | 6S             |                 |
|           | c                                | F                 | C              | F               | C               | f               | C              | f               |
| Pre-dose* | 5.38 ±<br>1.73                   | 0.15 ±<br>0.06    | 0.10 ±<br>0.07 | 0.10 ±<br>0.01  | 0.00            | 0.10 ±<br>0.01  | 1.62 ±<br>0.19 | 0.00            |
| 0.16      | 100.05 ±<br>39.63                | 641.57 ±<br>42.62 | 3.31 ±<br>3.31 | 55.43 ±<br>3.12 | 6.98 ±<br>2.85  | 65.31 ±<br>0.35 | 1.52 ±<br>0.67 | 11.68 ±<br>0.12 |
| 0.25      | 21.50 ±<br>14.62                 | 458.05 ±<br>15.61 | 3.54 ±<br>2.76 | 36.86 ±<br>1.53 | 8.58 ±<br>4.62  | 68.07 ±<br>7.34 | 1.36 ±<br>0.74 | 11.62 ±<br>0.80 |
| 0.5       | 20.62 ±<br>10.13                 | 286.74 ±<br>9.19  | 4.08 ±<br>3.01 | 50.04 ±<br>1.25 | 16.23 ±<br>1.80 | 80.92 ±<br>5.57 | 1.18 ±<br>0.86 | 9.19 ±<br>0.21  |
| 1         | 27.50 ±<br>1.96                  | 57.19 ±<br>3.34   | 3.16 ±<br>0.36 | 13.54 ±<br>0.99 | 20.93 ±<br>1.27 | 24.74 ±<br>1.73 | 0.97 ±<br>0.26 | 3.36 ±<br>0.08  |
| 2         | 7.62 ±<br>1.65                   | 33.87 ±<br>0.52   | 1.42 ±<br>0.73 | 7.09 ±<br>0.25  | 1.57 ±<br>0.46  | 13.57 ±<br>0.85 | 0.91 ±<br>0.33 | 1.25 ±<br>0.20  |
| 4         | 37.04 ±<br>3.37                  | 30.60 ±<br>0.93   | 8.98 ±<br>1.28 | 8.68 ±<br>0.74  | 20.39 ±<br>1.25 | 13.32 ±<br>0.55 | 1.28 ±<br>0.66 | 4.10 ±<br>0.56  |
| 6         | 4.58 ±<br>1.71                   | 11.14 ±<br>0.48   | 1.80 ±<br>0.16 | 4.01 ±<br>0.05  | 9.98 ±<br>0.59  | 5.32 ±<br>0.55  | 1.05 ±<br>0.49 | 1.64 ±<br>0.10  |
| 8         | 1.27 ±<br>0.48                   | 5.97 ±<br>0.10    | 0.92 ±<br>0.51 | 2.97 ±<br>0.19  | 3.67 ±<br>1.14  | 5.74 ±<br>0.20  | 0.80 ±<br>0.20 | 0.66 ±<br>0.16  |

SD: Standard deviation; LLOQ: 0.1 ng/mL; \*trough levels on day 7 after 6 days GE dosing

**Supplementary Table 4**  
**Concentrations of conjugated (c) and free (f) forms of GE phenolics in spleen**  
**following daily dose administration of GE (n=3 per time point, mean ± SD)**

| Time (h)  | Concentration (mean ± SD, ng/mL) |          |        |         |        |        |        |        |
|-----------|----------------------------------|----------|--------|---------|--------|--------|--------|--------|
|           | 6G                               |          | 8G     |         | 10G    |        | 6S     |        |
|           | c                                | F        | C      | F       | C      | f      | C      | f      |
| Pre-dose* | 0.34 ±                           | 1.23 ±   | 0.00   | 0.18 ±  | 0.00   | 0.17 ± | 1.43 ± | 0.10 ± |
|           | 0.16                             | 0.20     |        | 0.07    |        | 0.02   | 0.21   | 0.04   |
| 0.16      | 95.40 ±                          | 380.92 ± | 2.15 ± | 14.50 ± | 0.35 ± | 3.17 ± | 2.87 ± | 4.37 ± |
|           | 54.66                            | 51.82    | 1.04   | 0.92    | 0.34   | 0.08   | 0.40   | 0.05   |
| 0.25      | 4.74 ±                           | 148.06 ± | 1.24 ± | 8.04 ±  | 0.68 ± | 4.39 ± | 0.55 ± | 2.47 ± |
|           | 0.91                             | 6.28     | 1.23   | 0.37    | 0.36   | 0.35   | 0.14   | 0.41   |
| 0.5       | 28.17 ±                          | 200.57 ± | 2.28 ± | 16.07 ± | 3.60 ± | 9.78 ± | 0.97 ± | 3.72 ± |
|           | 21.92                            | 3.86     | 1.98   | 0.30    | 1.09   | 0.44   | 0.35   | 0.13   |
| 1         | 5.86 ±                           | 97.93 ±  | 1.47 ± | 10.62 ± | 1.75 ± | 4.30 ± | 0.71 ± | 0.96 ± |
|           | 2.36                             | 7.14     | 0.52   | 1.27    | 0.07   | 0.60   | 0.09   | 0.10   |
| 2         | 7.33 ±                           | 24.00 ±  | 0.49 ± | 1.68 ±  | 0.68 ± | 1.13 ± | 1.76 ± | 0.23 ± |
|           | 3.05                             | 2.51     | 0.27   | 0.24    | 0.42   | 0.16   | 0.63   | 0.01   |
| 4         | 7.65 ±                           | 11.10 ±  | 1.52 ± | 1.75 ±  | 1.03 ± | 1.86 ± | 0.57 ± | 0.91 ± |
|           | 0.99                             | 1.37     | 0.31   | 0.29    | 0.19   | 0.20   | 0.15   | 0.10   |
| 6         | 9.12 ±                           | 11.65 ±  | 2.16 ± | 2.33 ±  | 2.77 ± | 1.93 ± | 2.43 ± | 0.10 ± |
|           | 9.86                             | 0.73     | 2.57   | 0.22    | 3.11   | 0.19   | 1.41   | 0.02   |
| 8         | 2.20 ±                           | 4.24 ±   | 0.20 ± | 0.26 ±  | 0.70 ± | 0.88 ± | 0.84 ± | 0.22 ± |
|           | 1.44                             | 1.44     | 0.16   | 0.08    | 0.29   | 0.71   | 0.25   | 0.01   |

SD: Standard deviation; LLOQ: 0.1 ng/mL; \*trough levels on day 7 after 6 days GE dosing

**Supplementary Table 5**  
**Concentrations of conjugated (c) and free (f) forms of GE phenolics in heart**  
**following daily dose administration of GE (n=3 per time point, mean ± SD)**

| Time (h)  | Concentration (mean ± SD, ng/mL) |                |                 |                |                |                |                  |                |
|-----------|----------------------------------|----------------|-----------------|----------------|----------------|----------------|------------------|----------------|
|           | 6G                               |                | 8G              |                | 10G            |                | 6S               |                |
|           | c                                | F              | C               | F              | C              | f              | C                | f              |
| Pre-dose* | 1.09 ±<br>0.90                   | 0.65 ±<br>0.27 | 0.15 ±<br>0.11  | 0.10 ±<br>0.05 | 0.14 ±<br>0.02 | 0.10 ±<br>0.02 | 0.85 ±<br>0.13   | 0.00           |
| 0.16      | 154.13 ±<br>44.16                | 9.69 ±<br>2.37 | 11.05 ±<br>0.75 | 0.15 ±<br>0.06 | 5.52 ±<br>0.63 | 0.25 ±<br>0.11 | 1.58 ±<br>0.27   | 0.00           |
| 0.25      | 91.20 ±<br>22.62                 | 6.67 ±<br>1.82 | 9.91 ±<br>1.45  | 0.10 ±<br>0.01 | 4.75 ±<br>1.41 | 0.25 ±<br>0.01 | 1.21 ±<br>0.20   | 0.62 ±<br>0.14 |
| 0.5       | 115.89 ±<br>2.15                 | 5.99 ±<br>0.38 | 17.45 ±<br>0.20 | 0.11 ±<br>0.02 | 8.74 ±<br>0.61 | 0.38 ±<br>0.01 | 3.30 ±<br>0.38   | 0.13 ±<br>0.02 |
| 1         | 24.55 ±<br>2.44                  | 2.78 ±<br>0.32 | 4.45 ±<br>0.10  | 0.12 ±<br>0.10 | 2.68 ±<br>0.35 | 0.28 ±<br>0.04 | 0.78 ±<br>0.39   | 0.15 ±<br>0.07 |
| 2         | 13.23 ±<br>1.14                  | 1.95 ±<br>0.14 | 1.33 ±<br>0.30  | 0.33 ±<br>0.03 | 0.74 ±<br>0.16 | 0.28 ±<br>0.08 | 1.73 ±<br>0.25   | 0.10 ±<br>0.01 |
| 4         | 15.65 ±<br>1.14                  | 0.79 ±<br>0.09 | 2.26 ±<br>0.30  | 0.12 ±<br>0.03 | 1.07 ±<br>0.06 | 0.10 ±<br>0.02 | 1.22 ±<br>± 0.09 | 0.10 ±<br>0.03 |
| 6         | 8.60 ±<br>1.14                   | 0.66 ±<br>0.26 | 1.77 ±<br>0.65  | 0.12 ±<br>0.05 | 0.87 ±<br>0.07 | 0.00           | 1.30 ±<br>0.19   | 0.00           |
| 8         | 1.01 ±<br>0.58                   | 0.68 ±<br>0.06 | 0.17 ±<br>0.03  | 0.10 ±<br>0.01 | 0.00           | 0.10 ±<br>0.03 | 1.15 ±<br>0.01   | 0.10 ±<br>0.02 |

SD: Standard deviation; LLOQ: 0.1 ng/mL; \*trough levels on day 7 after 6 days GE dosing

**Supplementary Table 6**  
**Concentrations of conjugated (c) and free (f) forms of GE phenolics in brain**  
**following daily dose administration of GE (n=3 per time point, mean ± SD)**

| Time (h)  | Concentration (mean ± SD, ng/mL) |         |        |        |        |        |        |        |
|-----------|----------------------------------|---------|--------|--------|--------|--------|--------|--------|
|           | 6G                               |         | 8G     |        | 10G    |        | 6S     |        |
|           | c                                | F       | C      | F      | C      | f      | C      | f      |
| Pre-dose* | 0.42±                            | 2.92 ±  | 0.10 ± | 0.17 ± | 0.11 ± | 0.77 ± | 0.90 ± | 0.10 ± |
|           | 0.23                             | 0.31    | 0.04   | 0.03   | 0.11   | 0.03   | 0.03   | 0.02   |
| 0.16      | 1.47 ±                           | 12.09 ± | 0.73 ± | 0.79 ± | 0.10 ± | 0.80 ± | 0.64 ± | 0.10 ± |
|           | 1.00                             | 0.44    | 0.22   | 0.07   | 0.06   | 0.06   | 0.23   | 0.00   |
| 0.25      | 8.67 ±                           | 6.88 ±  | 0.38 ± | 0.32 ± | 0.10 ± | 0.83 ± | 0.11 ± | 0.10 ± |
|           | 4.86                             | 0.61    | 0.24   | 0.10   | 0.07   | 0.06   | 0.06   | 0.00   |
| 0.5       | 17.01 ±                          | 4.72 ±  | 2.48 ± | 0.20 ± | 0.47 ± | 1.01 ± | 0.98 ± | 0.10 ± |
|           | 1.95                             | 0.10    | 0.50   | 0.06   | 0.22   | 0.15   | 0.16   | 0.02   |
| 1         | 5.75 ±                           | 2.49 ±  | 1.25 ± | 0.17 ± | 0.28 ± | 0.96 ± | 1.38 ± | 0.30 ± |
|           | 2.23                             | 0.58    | 0.23   | 0.02   | 0.10   | 0.12   | 0.25   | 0.07   |
| 2         | 1.68 ±                           | 0.85 ±  | 0.20 ± | 0.10 ± | 0.10 ± | 0.49 ± | 1.35 ± | 0.10 ± |
|           | 0.40                             | 0.22    | 0.10   | 0.03   | 0.06   | 0.10   | 0.40   | 0.01   |
| 4         | 1.88 ±                           | 1.16 ±  | 0.24 ± | 0.20 ± | 0.10 ± | 0.61 ± | 1.49 ± | 0.00   |
|           | 0.41                             | 0.31    | 0.03   | 0.04   | 0.04   | 0.03   | 0.01   |        |
| 6         | 0.41 ±                           | 1.64 ±  | 0.20 ± | 0.62 ± | 0.13 ± | 0.87 ± | 1.18 ± | 0.10 ± |
|           | 0.17                             | 0.13    | 0.21   | 0.21   | 0.04   | 0.12   | 0.25   | 0.01   |
| 8         | 1.73 ±                           | 4.76 ±  | 3.00 ± | 4.85 ± | 0.42 ± | 2.63 ± | 0.80 ± | 0.30 ± |
|           | 0.86                             | 2.34    | 3.85   | 3.75   | 0.28   | 0.29   | 0.16   | 0.05   |

SD: Standard deviation; LLOQ: 0.1 ng/mL; \*trough levels on day 7 after 6 days GE dosing

**Supplementary Table 7**  
**Concentrations of conjugated (c) and free (f) forms of GE phenolics in lung**  
**following daily dose administration of GE (n=3 per time point, mean ± SD)**

| Time (h)  | Concentration (mean ± SD, ng/mL) |          |         |         |         |         |        |        |
|-----------|----------------------------------|----------|---------|---------|---------|---------|--------|--------|
|           | 6G                               |          | 8G      |         | 10G     |         | 6S     |        |
|           | c                                | F        | C       | F       | C       | f       | C      | f      |
| Pre-dose* | 0.48 ±                           | 1.40 ±   | 0.10 ±  | 0.10 ±  | 0.10 ±  | 0.17 ±  | 1.20 ± | 0.00   |
|           | 0.29                             | 0.13     | 0.06    | 0.01    | 0.02    | 0.02    | 0.35   |        |
| 0.16      | 85.58 ±                          | 98.88 ±  | 7.25 ±  | 8.22 ±  | 4.21 ±  | 3.45 ±  | 0.61 ± | 1.44 ± |
|           | 16.05                            | 7.14     | 2.73    | 0.11    | 1.37    | 0.07    | 0.23   | 0.02   |
| 0.25      | 178.43 ±                         | 104.56 ± | 17.18 ± | 15.28 ± | 11.50 ± | 8.63 ±  | 2.03 ± | 0.63 ± |
|           | 6.23                             | 1.36     | 1.04    | 0.17    | 0.34    | 0.37    | 0.60   | 0.15   |
| 0.5       | 258.48 ±                         | 75.12 ±  | 42.99 ± | 15.20 ± | 26.68 ± | 10.01 ± | 2.81 ± | 2.45 ± |
|           | 16.15                            | 1.98     | 3.37    | 0.80    | 3.73    | 0.70    | 0.72   | 0.44   |
| 1         | 62.47 ±                          | 17.94 ±  | 10.98 ± | 3.19 ±  | 10.04 ± | 2.87 ±  | 1.09 ± | 0.23 ± |
|           | 10.08                            | 0.95     | 1.96    | 0.26    | 2.11    | 0.34    | 0.42   | 0.02   |
| 2         | 32.75 ±                          | 14.43 ±  | 3.55 ±  | 3.22 ±  | 2.10 ±  | 2.68 ±  | 1.14 ± | 0.10 ± |
|           | 4.95                             | 0.95     | 0.66    | 0.28    | 0.87    | 0.03    | 0.50   | 0.01   |
| 4         | 27.63 ±                          | 3.15 ±   | 5.83 ±  | 0.30 ±  | 4.41 ±  | 0.46 ±  | 1.27 ± | 0.10 ± |
|           | 10.18                            | 0.21     | 2.35    | 0.05    | 1.40    | 0.05    | 0.21   | 0.02   |
| 6         | 20.24 ±                          | 4.95 ±   | 5.50 ±  | 1.81 ±  | 4.72 ±  | 1.55 ±  | 1.37 ± | 0.00   |
|           | 1.33                             | 0.40     | 0.43    | 0.19    | 0.18    | 0.14    | 0.30   |        |
| 8         | 6.44 ±                           | 5.53 ±   | 2.09 ±  | 1.52 ±  | 1.54 ±  | 1.35 ±  | 0.91 ± | 0.12 ± |
|           | 1.34                             | 0.87     | 0.95    | 0.70    | 1.18    | 0.78    | 0.12   | 0.02   |

SD: Standard deviation; LLOQ: 0.1 ng/mL; \*trough levels on day 7 after 6 days GE dosing



**Supplementary Table 8**  
**Concentrations of conjugated (c) and free (f) forms of GE phenolics in kidney**  
**following daily dose administration of GE (n=3 per time point, mean ± SD)**

| Time (h)  | Concentration (mean ± SD, ng/mL) |          |         |          |          |          |        |         |
|-----------|----------------------------------|----------|---------|----------|----------|----------|--------|---------|
|           | 6G                               |          | 8G      |          | 10G      |          | 6S     |         |
|           | c                                | f        | C       | F        | C        | f        | C      | f       |
| Pre-dose* | 2.47 ±                           | 0.1 ±    | 0.1 ±   | 0.1 ±    | 0.1 ±    | 0.1 ±    | 1.31 ± | 0.00    |
|           | 0.15                             | 0.03     | 0.15    | 0.02     | 0.08     | 0.02     | 0.11   |         |
| 0.16      | 153.35 ±                         | 778.27 ± | 28.95 ± | 76.97 ±  | 6.64 ±   | 16.34 ±  | 3.29 ± | 19.74 ± |
|           | 13.26                            | 33.34    | 6.83    | 3.09     | 2.15     | 0.62     | 1.36   | 0.38    |
| 0.25      | 348.81 ±                         | 1035.58  | 26.37 ± | 173.66 ± | 22.86 ±  | 73.32 ±  | 5.62 ± | 30.71 ± |
|           | 60.24                            | ± 4.80   | 7.11    | 2.99     | 4.94     | 1.59     | 0.96   | 0.06    |
| 0.5       | 167.38 ±                         | 873.36 ± | 25.08 ± | 196.95 ± | 24.47 ±  | 133.25 ± | 2.60 ± | 26.07 ± |
|           | 165.23                           | 173.97   | 11.86   | 45.92    | 29.07    | 28.67    | 1.72   | 4.42    |
| 1         | 335.97 ±                         | 131.64 ± | 73.80 ± | 38.57 ±  | 103.19 ± | 35.93 ±  | 3.68 ± | 4.54 ±  |
|           | 49.38                            | 8.40     | 10.21   | 2.53     | 22.53    | 1.62     | 0.57   | 0.06    |
| 2         | 99.10 ±                          | 60.50 ±  | 21.03 ± | 18.32 ±  | 15.86 ±  | 14.00 ±  | 0.57 ± | 1.46 ±  |
|           | 4.24                             | 3.93     | 0.15    | 0.81     | 1.61     | 0.86     | 0.49   | 0.17    |
| 4         | 110.10 ±                         | 22.13 ±  | 35.78 ± | 8.89 ±   | 21.47 ±  | 4.79 ±   | 0.54 ± | 1.10 ±  |
|           | 3.55                             | 1.63     | 0.34    | 0.91     | 1.05     | 0.65     | 0.19   | 0.29    |
| 6         | 69.89 ±                          | 16.47 ±  | 28.32 ± | 6.80 ±   | 26.15 ±  | 5.32 ±   | 1.20 ± | 0.10 ±  |
|           | 6.82                             | 1.79     | 5.29    | 1.23     | 6.09     | 0.88     | 0.61   | 0.03    |
| 8         | 21.37 ±                          | 6.96 ±   | 5.88 ±  | 3.35 ±   | 5.49 ±   | 2.46 ±   | 0.94 ± | 0.2 ±   |
|           | 1.83                             | 0.59     | 0.08    | 0.13     | 0.12     | 0.07     | 0.22   | 0.04    |

SD: Standard deviation; LLOQ: 0.1 ng/mL; \*trough levels on day 7 after 6 days GE dosing

**Supplementary Table 9**  
**Concentrations of conjugated (c) and free (f) forms of GE phenolics in tumor**  
**following daily dose administration of GE (n=3 per time point, mean ± SD)**

| Time (h)  | Concentration (mean ± SD, ng/mL) |         |        |         |        |         |        |        |
|-----------|----------------------------------|---------|--------|---------|--------|---------|--------|--------|
|           | 6G                               |         | 8G     |         | 10G    |         | 6S     |        |
|           | c                                | F       | C      | F       | C      | f       | C      | f      |
| Pre-dose* | 1.23 ±                           | 3.11 ±  | 0.10 ± | 0.22 ±  | 0.40 ± | 0.74 ±  | 0.92 ± | 0.00   |
|           | 1.37                             | 0.72    | 0.05   | 0.11    | 0.50   | 0.17    | 0.17   |        |
| 0.16      | 8.19 ±                           | 35.79 ± | 0.59 ± | 4.93 ±  | 0.27 ± | 3.14 ±  | 0.59 ± | 0.10 ± |
|           | 4.31                             | 1.43    | 0.27   | 0.29    | 0.12   | 0.19    | 0.08   | 0.01   |
| 0.25      | 6.41 ±                           | 94.36 ± | 1.67 ± | 16.97 ± | 3.88 ± | 14.05 ± | 0.38 ± | 3.67 ± |
|           | 1.65                             | 1.36    | 0.92   | 0.72    | 0.93   | 0.50    | 0.12   | 0.30   |
| 0.5       | 4.82 ±                           | 96.79 ± | 2.92 ± | 22.58 ± | 3.08 ± | 15.78 ± | 0.49 ± | 3.61 ± |
|           | 3.78                             | 3.24    | 1.71   | 1.42    | 1.36   | 0.94    | 0.31   | 0.35   |
| 1         | 8.24 ±                           | 13.58 ± | 2.04 ± | 4.16 ±  | 1.88 ± | 6.62 ±  | 1.11 ± | 0.17 ± |
|           | 1.11                             | 3.17    | 0.69   | 0.78    | 1.00   | 1.03    | 0.15   | 0.04   |
| 2         | 3.90 ±                           | 5.04 ±  | 1.64 ± | 2.95 ±  | 0.38 ± | 5.55 ±  | 1.63 ± | 0.10 ± |
|           | 1.90                             | 0.70    | 1.17   | 0.39    | 0.34   | 0.99    | 0.20   | 0.02   |
| 4         | 3.63 ±                           | 4.00 ±  | 1.00 ± | 0.77 ±  | 0.43 ± | 0.83 ±  | 1.22 ± | 0.00   |
|           | 0.74                             | 0.08    | 0.68   | 0.02    | 0.15   | 0.14    | 0.10   |        |
| 6         | 2.19 ±                           | 2.33 ±  | 0.63 ± | 0.33 ±  | 0.40 ± | 0.44 ±  | 1.10 ± | 0.10 ± |
|           | 0.36                             | 0.24    | 0.15   | 0.10    | 0.14   | 0.16    | 0.14   | 0.01   |
| 8         | 0.50 ±                           | 1.37 ±  | 0.30 ± | 0.20 ±  | 0.10 ± | 0.28 ±  | 1.12 ± | 0.10 ± |
|           | 0.55                             | 0.30    | 0.24   | 0.05    | 0.01   | 0.06    | 0.33   | 0.02   |

SD: Standard deviation; LLOQ: 0.1 ng/mL; \*trough levels on day 7 after 6 days GE dosing

**Supplementary Table 10**  
**Comparison of exposure (AUC<sub>last</sub>) of free GE phenolics in plasma and collected**  
**tissues (n=3 per time point, mean values presented)**

| <b>Organs</b> | <b>AUC<sub>last</sub> (ng.h/mL)</b> |           |            |           |
|---------------|-------------------------------------|-----------|------------|-----------|
|               | <b>6G</b>                           | <b>8G</b> | <b>10G</b> | <b>6S</b> |
| Plasma        | 642                                 | 132       | 1597       | 52        |
| Liver         | 449                                 | 81        | 132        | 23        |
| Spleen        | 307                                 | 28        | 18         | 6         |
| Heart         | 13                                  | 1         | 1          | 1         |
| Brain         | 18                                  | 7         | 8          | 1         |
| Lung          | 115                                 | 22        | 17         | 2         |
| Kidney        | 875                                 | 189       | 135        | 26        |
| Tumor         | 94                                  | 22        | 26         | 3         |

**Supplementary Table 11**  
**Ratio of conjugate to free GE phenolics AUC<sub>last</sub> ratio**  
**(n=3 per time point, mean values presented)**

| <b>Organs</b> | <b>Conjugated/Free AUC<sub>last</sub> ratio</b> |           |            |           |
|---------------|-------------------------------------------------|-----------|------------|-----------|
|               | <b>6G</b>                                       | <b>8G</b> | <b>10G</b> | <b>6S</b> |
| Stomach       | 0.54                                            | 0.53      | 0.59       | 0.26      |
| S.Intestine   | 0.24                                            | 0.20      | 0.22       | 0.29      |
| Liver         | 0.31                                            | 0.36      | 0.69       | 0.36      |
| Spleen        | 0.24                                            | 0.38      | 0.67       | 1.93      |
| Heart         | 12.55                                           | 18.54     | 10.22      | 15.46     |
| Brain         | 1.17                                            | 0.89      | 0.19       | 10.25     |
| Lung          | 2.92                                            | 2.61      | 2.50       | 5.57      |
| Kidney        | 1.06                                            | 1.26      | 1.60       | 0.41      |
| Tumor         | 0.31                                            | 0.46      | 0.22       | 9.67      |

**Supplementary Table 12**

**(a) Total exposure (free + glucuronide) of GE phenolics in collected tissues per mg of organ weight (n = 3 per time point, mean values presented)**

| <b>Organs</b> | <b>AUC<sub>last</sub> (ng.h/mL) / mg of organ weight</b> |           |            |           |
|---------------|----------------------------------------------------------|-----------|------------|-----------|
|               | <b>6G</b>                                                | <b>8G</b> | <b>10G</b> | <b>6S</b> |
| Stomach       | 221                                                      | 59        | 61         | 21        |
| S.Intestine   | 5.58                                                     | 1.57      | 2.28       | 0.40      |
| Liver         | 2.24                                                     | 0.42      | 0.85       | 0.12      |
| Spleen        | 4.70                                                     | 0.48      | 0.37       | 0.21      |
| Heart         | 1.38                                                     | 0.18      | 0.10       | 0.09      |
| Brain         | 0.14                                                     | 0.05      | 0.03       | 0.04      |
| Lung          | 4.12                                                     | 0.74      | 0.55       | 0.11      |
| Kidney        | 10.35                                                    | 2.46      | 2.06       | 0.21      |
| Tumor         | 0.99                                                     | 0.26      | 0.26       | 0.25      |

**(b) Weights of various organs (mg, n=3 at each time point)**

| <b>Organs</b> | <b>Stomach</b> | <b>S.<br/>Intestine</b> | <b>Liver</b> | <b>Spleen</b> | <b>Heart</b> | <b>Brain</b> | <b>Lung</b> | <b>Kidney</b> | <b>Tumor</b> |
|---------------|----------------|-------------------------|--------------|---------------|--------------|--------------|-------------|---------------|--------------|
| 0 min         | 120            | 211                     | 337          | 75            | 135          | 418          | 121         | 214           | 96           |
| 10 min        | 133            | 271                     | 423          | 84            | 134          | 285          | 145         | 195           | 118          |
| 15 min        | 126            | 101                     | 116          | 67            | 117          | 125          | 110         | 92            | 111          |
| 30 min        | 132            | 126                     | 113          | 94            | 136          | 113          | 108         | 121           | 117          |
| 1 h           | 117            | 133                     | 156          | 93            | 123          | 126          | 106         | 121           | 114          |
| 2 h           | 138            | 136                     | 148          | 83            | 132          | 210          | 101         | 189           | 120          |
| 4 h           | 148            | 323                     | 369          | 88            | 134          | 379          | 89          | 231           | 167          |
| 6 h           | 119            | 226                     | 279          | 66            | 123          | 393          | 86          | 170           | 127          |
| 8 h           | 186            | 328                     | 427          | 82            | 136          | 421          | 119         | 230           | 151          |
| Average       | 135            | 206                     | 263          | 81            | 130          | 274          | 109         | 174           | 125          |
| SD            | 21             | 87                      | 131          | 10            | 7            | 133          | 18          | 51            | 22           |
| %CV           | 16             | 42                      | 50           | 13            | 5            | 49           | 16          | 30            | 17           |

**Supplementary Table 13**  
**Total exposure AUC<sub>last</sub> (free + conjugated form) of GE phenolics in various tissues**  
**(n=3 per time point, mean values presented)**

| <b>Organs</b> | <b>AUC<sub>last</sub> (ng.h/mL)</b> |           |            |           |
|---------------|-------------------------------------|-----------|------------|-----------|
|               | <b>6G</b>                           | <b>8G</b> | <b>10G</b> | <b>6S</b> |
| Stomach       | 29869                               | 8007      | 8268       | 2868      |
| S.Intestine   | 1150                                | 324       | 469        | 82        |
| Liver         | 590                                 | 111       | 223        | 32        |
| Spleen        | 382                                 | 39        | 30         | 17        |
| Heart         | 179                                 | 24        | 13         | 12        |
| Brain         | 39                                  | 13        | 9          | 11        |
| Lung          | 451                                 | 81        | 60         | 12        |
| Kidney        | 1798                                | 428       | 351        | 36        |
| Tumor         | 123                                 | 33        | 32         | 31        |

**Supplementary Figure 1**  
**Structure of GE phenolics and 6 gingerol phenolic glucuronide**

| Name                            | Structure |
|---------------------------------|-----------|
| 6-gingerol                      |           |
| 8-gingerol                      |           |
| 10-gingerol                     |           |
| 6-shogaol                       |           |
| 6-gingerol phenolic glucuronide |           |

**Supplementary Figure 2**  
***In silico* analysis of  $\beta$ -glucuronidase expression in various cancer cells**

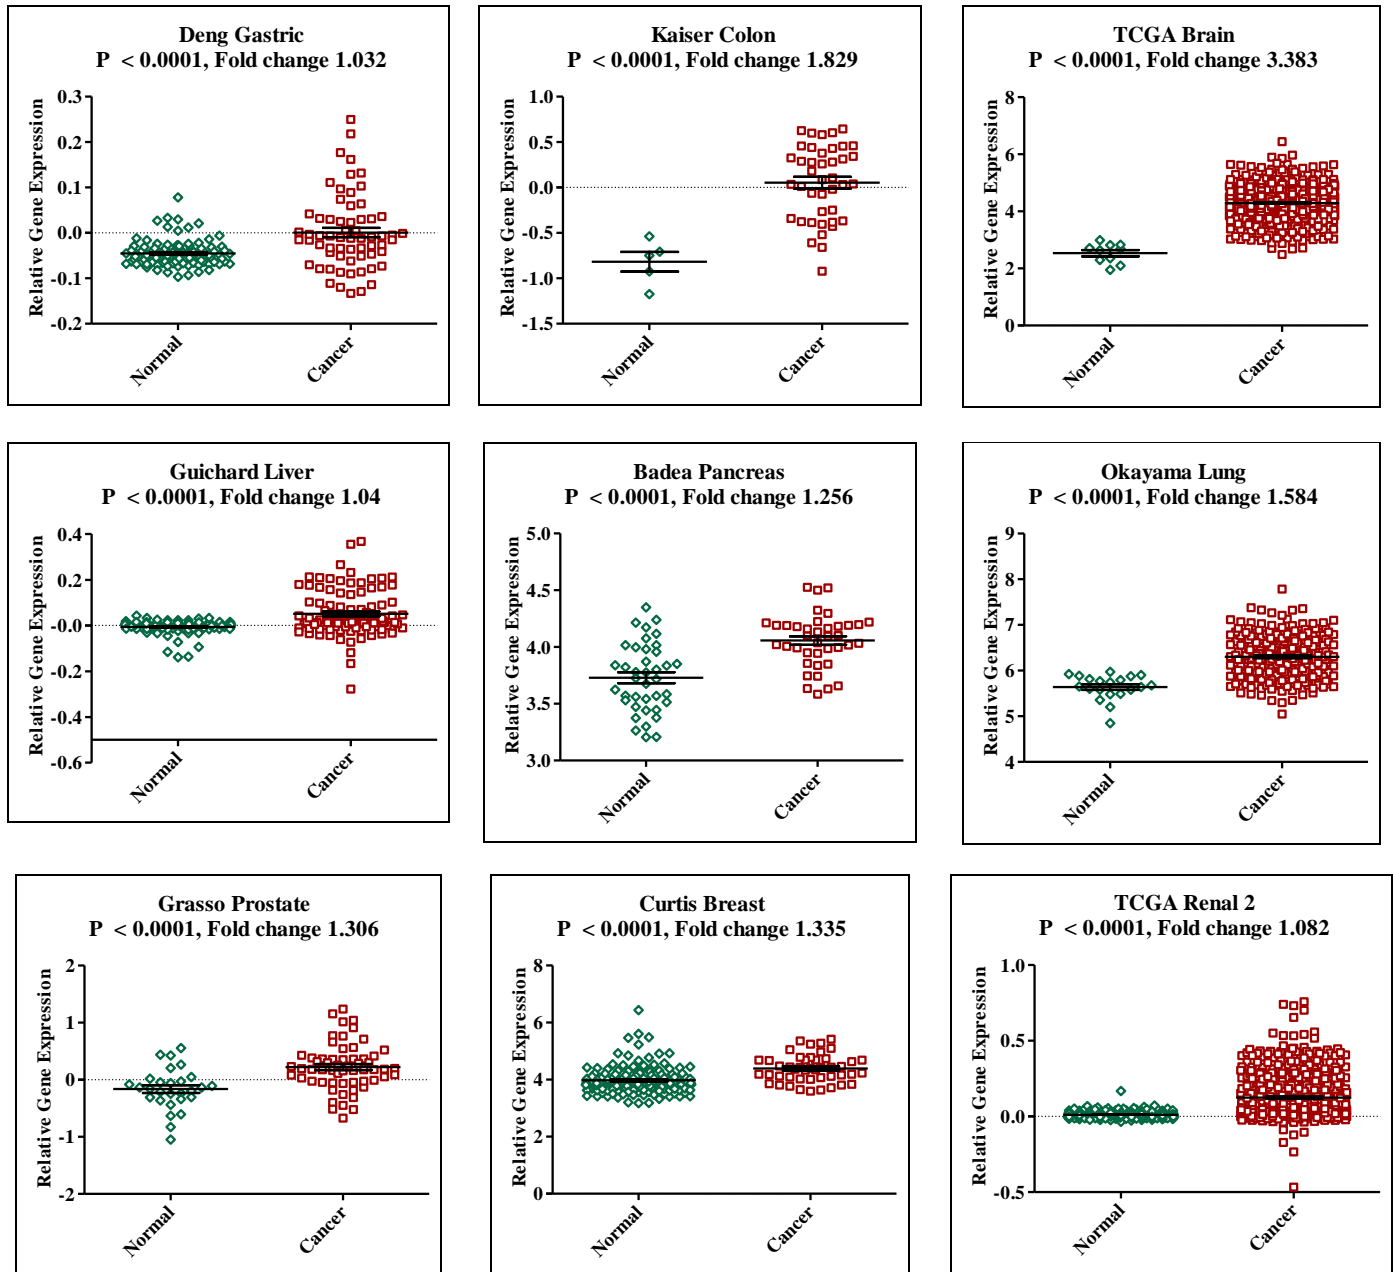

Supplement: 41598_2018_21125_MOESM1_ESM.pdf [file 41598_2018_21125_MOESM1_ESM.pdf]
